1 **Effectiveness of one dose of killed oral cholera vaccine in an endemic**  
2 **community in the Democratic Republic of the Congo: A matched case-control**  
3 **study**

4 Espoir Bwenge Malembaka, MD PhD<sup>1,2</sup>, Patrick Musole Bugeme, MD<sup>1,2</sup>, Chloe Hutchins, PhD<sup>3</sup>,  
5 Hanmeng Xu, MHS<sup>1</sup>, Juan Dent Hulse, ScM<sup>1</sup>, Maya N. Demby, BSc<sup>1</sup>, Karin Gallandat, PhD<sup>3</sup>,  
6 Jaime Mufitini Saidi, BSc<sup>4</sup>, Baron Bashige Rumedeka, BSc<sup>1,4</sup>, Moïse Itongwa, BSc<sup>1</sup>, Esperance  
7 Tshiwedi-Tsilabia, MSc<sup>5</sup>, Faïda Kitoga, MSc<sup>5</sup>, Tavia Bodisa-Matamu, MD<sup>5</sup>, Hugo Kavunga-  
8 Membo, MD PhD<sup>5,6</sup>, Justin Bengheya, MPH<sup>7</sup>, Jean-Claude Kulondwa, MD<sup>7</sup>, Amanda K Debes,  
9 PhD<sup>8</sup>, Nagède Taty, MD<sup>9</sup>, Elizabeth C. Lee, PhD<sup>1</sup>, Octavie Lunguya MD PhD<sup>6,10</sup>, Prof. Justin  
10 Lessler, PhD<sup>1,11,12</sup>, Daniel T Leung, MD<sup>13,14</sup>, Oliver Cumming, MSc<sup>3</sup>, Placide Welo Okitayemba,  
11 MD<sup>9</sup>, Daniel Mukadi-Bamuleka, MD PhD<sup>5,6,10</sup>, Jackie Knee, PhD<sup>3</sup>, Andrew S Azman, PhD<sup>1,15,16\*</sup>

12 <sup>1</sup>*Department of Epidemiology, Johns Hopkins University, Baltimore, MD 21205, USA*

13 <sup>2</sup>*Centre for Tropical Diseases and Global Health (CTDGH), Université Catholique de Bukavu,*  
14 *Bukavu, Democratic Republic of the Congo*

15 <sup>3</sup>*Department of Disease Control, London School of Hygiene & Tropical Medicine, London, UK*

16 <sup>4</sup>*Ministère de la Santé Publique, Zone de Santé d'Uvira, Democratic Republic of Congo*

17 <sup>5</sup>*Rodolphe Merieux INRB-Goma Laboratory, Goma, North-Kivu, Democratic Republic of the*  
18 *Congo*

19 <sup>6</sup>*Institut National de Recherche Biomédicale, INRB, Kinshasa, Democratic Republic of the*  
20 *Congo*

21  
22 <sup>7</sup>*Ministère de la Santé Publique, Hygiène et Prévention, Division Provinciale de la Santé*  
23 *Publique du Sud-Kivu, Democratic Republic of the Congo*

24 <sup>8</sup>*Department of International Health, Johns Hopkins University, Baltimore, MD 21205, USA*

25 <sup>9</sup>*PNECHOL-MD, Community IMCI, Ministry of Health, Democratic Republic of the Congo*

26 <sup>10</sup>*Service of Microbiology, Department of Medical Biology, University of Kinshasa, Kinshasa,*  
27 *Democratic Republic of the Congo*

28 <sup>11</sup>*University of North Carolina Population Center, University of North Carolina at Chapel Hill,*  
29 *Chapel Hill, NC, USA*

30 <sup>12</sup>*Department of Epidemiology, Gillings School of Global Public Health, University of North*  
31 *Carolina at Chapel Hill, Chapel Hill, NC, USA*

32 <sup>13</sup>*Division of Infectious Diseases, University of Utah School of Medicine, Salt Lake City, Utah,*  
33 *USA*

2

34 <sup>14</sup>*Division of Microbiology and Immunology, University of Utah School of Medicine, Salt Lake*  
35 *City, Utah, USA*

36

37 <sup>15</sup>*Geneva Centre for Emerging Viral Diseases, Geneva University Hospitals, Geneva,*  
38 *Switzerland*

39 <sup>16</sup>*Division of Tropical and Humanitarian Medicine, Geneva University Hospitals, Geneva,*  
40 *Switzerland*

41 \* Correspondence to:

42 Dr Andrew S Azman,  
43 Department of Epidemiology, Johns Hopkins Bloomberg School of Public Health,  
44 Johns Hopkins University, Baltimore, MD 21205, USA  
45 [azman@jhu.edu](mailto:azman@jhu.edu)

46

47

48

49

50

51

52

53

54

55

56

57

58

59

60

61

62

63

64

65

66

67

68

69

70

71

72

73

74

75 **Abstract**

76 **Background**

77 A global shortage of cholera vaccines has increased the use of single-dose regimens, rather than  
78 the standard two-dose regimen. There is limited evidence on single-dose protection, particularly  
79 in children. In 2020, a mass vaccination campaign resulting in largely single dose coverage, was  
80 conducted in Uvira, an endemic urban setting in eastern Democratic Republic of the Congo. We  
81 examined the effectiveness of a single-dose of the oral cholera vaccine Euvichol-Plus<sup>®</sup> in this  
82 high-burden setting.

83 **Methods**

84 We recruited medically attended confirmed cholera cases and age-, sex-, and neighborhood-  
85 matched community controls during two distinct periods after mass vaccination, October 2021 to  
86 March 2022 (12–17 months post-vaccination) and October 2022 to October 2023 (24–36 months  
87 post-vaccination). The odds of vaccination in cases and controls were contrasted in conditional  
88 logistic regression models to estimate unadjusted and adjusted vaccine effectiveness.

89 **Findings**

90 We enrolled 658 confirmed cases and 2,274 matched controls during the two study periods with  
91 15.0% of cases being under five years old at the time of vaccination. The adjusted single-dose  
92 VE was 52.7% (95% CI: 31.4–67.4) 12–17 months post-vaccination and 45.5% (95% CI: 25.8–  
93 60.0) 24–36 months post-vaccination. While protection in the first 12–17 months post-  
94 vaccination was similar for 1–4-year-olds and older individuals, over the third year post-  
95 vaccination the estimate of protection in 1–4 year-olds (adjusted VE 33.1%; 95% CI: -30.0–65.6)  
96 appeared to wane with confidence intervals spanning the null.

97 **Interpretation**

98 A single-dose of Euvichol-Plus<sup>®</sup> provided substantial protection against medically attended  
99 cholera for at least 36 months post-vaccination in this cholera endemic setting. While our  
100 evidence provides support for comparable levels of protection in young children and others in the  
101 short-term, protection among young children may wane significantly by the third year after  
102 vaccination.

103 **Funding**

104 Wellcome Trust and Gavi (GAVI-RFP-2019-062).

105

106

## 107 **Research in context**

### 108 *Evidence before this study*

109  
110 In late 2022, due to increasing demand for killed, whole-cell, oral cholera vaccines (kOCV)  
111 and limited production capacity, the International Coordinating Group (the organization  
112 managing emergency stocks of kOCVs) changed policy to deploy single-dose, rather than the  
113 standard two-dose regimen, for emergency vaccination campaigns. This decision was in line with  
114 WHO guidance on the use of a single dose in outbreaks, where short-term protection is key.  
115 However, this recommendation is based on a limited number of clinical studies with short-term  
116 follow-up. There is also limited evidence on the magnitude and duration of protection conferred  
117 by a single dose of kOCV, particularly in children under five years of age.

118  
119 We searched PubMed for randomized trials and observational studies published in English  
120 before November 1, 2023, that reported estimates of protection conferred by a single dose of  
121 kOCV, using the term “(effectiveness OR efficacy) AND cholera\* AND vaccine”. We found no  
122 published studies estimating the effectiveness of a single dose of Euvichol-Plus<sup>®</sup>, and only one  
123 study reporting two-dose effectiveness. Despite this paucity of evidence, this is the only vaccine  
124 currently available in the global stockpile. To date, there has been one randomized trial  
125 conducted in Bangladesh between 2014 and 2016, and seven observational studies conducted  
126 between 2009 and 2016 in Guinea, Haiti, India, Malawi, Sudan, Zambia and Zanzibar, reporting  
127 effectiveness estimates of a single dose of the current generation of kOCV. Aside from the trial  
128 in Bangladesh, all estimates were based on secondary analyses that the studies were not powered  
129 to estimate. The Bangladesh trial is the only study to date that provides an age-stratified estimate  
130 of single-dose protection, and while it found an overall protective efficacy of 62% (95% CI: 43–  
131 75) during the 2-year follow up for individuals aged five years or older, it found no significant  
132 protection conferred by the Shanchol kOCV (a bioequivalent of Euvichol-Plus<sup>®</sup>) for individuals  
133 under five years of age (protective efficacy: -44%, 95% CI -220 to 35). Four of the seven  
134 observational studies provide single-dose vaccine effectiveness (VE) estimates only during the  
135 first 12 months post-vaccination with estimates ranging from 43% (95% CI -84-82) in Guinea to  
136 93% (95% CI 69-98) in Haiti. The three other observational studies providing a single dose VE  
137 estimate between 12-30 months post- vaccination were unable to demonstrate statistically  
138 significant protection conferred by kOCV, with estimates ranging between 32.5% (95% CI -  
139 318.0-89.1) in India and 40% (95% CI -31-73) in Haiti. No vaccine protection estimates have  
140 been published from the two identified cholera endemic foci in Africa, the Democratic Republic  
141 of the Congo and Nigeria.

### 142 *Added value of this study*

143 In this vaccine effectiveness study, we show that a single dose of Euvichol-Plus<sup>®</sup> vaccine can  
144 provide significant protection against medically attended cholera for up to 36 months  
145 after vaccination in a cholera endemic setting in Africa, though protection in children under five  
146 years old remains unclear. These estimates help fill critical gaps in our understanding of the  
147 magnitude and duration of protection from a single dose of the most widely used kOCV,  
148 Euvichol-Plus<sup>®</sup> and is one of only a few studies to measure protection in an endemic setting in  
149 Africa.

### 150 *Implications of all the available evidence*

151 The corpus of available evidence suggests that use of a single dose of kOCV in  
152 emergency situations where cholera is endemic, like Uvira, is justified and that providing a  
153 second dose within the first 12-24 months post-vaccination may only provide marginal benefit to  
154 the general population. However, more evidence and analyses are needed to weigh the costs and  
155 benefits of tailored vaccination approaches for those under five years old, including possibility of  
156 providing a second dose at an earlier timepoint.  
157  
158

## 159 **Introduction**

160 Safe water, sanitation, and hygiene (WASH) is the cornerstone of cholera prevention and control.  
161 While universal access to safely-managed WASH services remains the ultimate priority, this is  
162 likely a distant prospect.<sup>1</sup> Killed whole-cell oral cholera vaccine (kOCV) is an effective short-  
163 term intervention to reduce cholera risk in high-burden settings and is a key component of the  
164 global roadmap to end cholera.<sup>2</sup> kOCVs are typically delivered as a two-dose regimen that  
165 provides protection for at least three years.<sup>3,4</sup> In a meta-analysis of kOCV protection, estimated  
166 two-dose efficacy was 58% (95% CI: 42 to 69), over an average of 28 months post-vaccination.  
167 Lower protection was noted among young children.<sup>3</sup>

168 The Euvichol-Plus<sup>®</sup> vaccine (Eubiologics, Seoul, Republic of Korea) is currently the only WHO-  
169 prequalified kOCV manufactured and included in the global stockpile after the Shanchol<sup>®</sup>  
170 (Shantha Biotechnics, Hyderabad, India) ceased production in 2023.<sup>5</sup> Euvichol-Plus<sup>®</sup> is  
171 considered a bioequivalent of Shanchol<sup>®</sup>.<sup>6</sup> Almost all evidence of kOCV clinical protection is  
172 based on the studies carried out on Shanchol<sup>®</sup>,<sup>7-9</sup> although one observational study explored the  
173 protection conferred by a Euvichol-Plus<sup>®</sup> two-dose regimen.<sup>10</sup>

174 Demand for kOCVs outstripped the global supply in 2022, with only 33 million doses distributed  
175 out of the 72 million requested.<sup>11</sup> In late 2022, the International Coordinating Group, which  
176 manages the global emergency stockpile for cholera vaccines, suspended the provision of the  
177 standard two-dose regimen in emergency vaccination campaigns, replacing it with a single-dose  
178 regimen due to limited vaccine supply.<sup>12</sup> However, there are limited data on the protection  
179 offered by one dose of kOCV over extended periods (>12 months) or among children 1-4 years  
180 old.

181 Only a few studies have estimated single-dose protection in the general population, with point  
182 estimates suggesting short-term protection up to 16 months after vaccination in Haiti, though  
183 with large uncertainty.<sup>7-9,13-16</sup> A randomized trial in Bangladesh, the only study to provide age-  
184 stratified estimates of single-dose protection, suggested that Shanchol<sup>®</sup> conferred no protection  
185 in 1-4 year-olds in the first six months post-vaccination, despite significant protection in older  
186 individuals for at least two years.<sup>17,18</sup>

187 In late 2020, the Ministry of Health of the Democratic Republic of the Congo (DRC) conducted  
188 a mass vaccination campaign of Euvichol-Plus<sup>®</sup> in the city of Uvira in the South Kivu province.  
189 The estimated coverage of the vaccination campaigns was low, and as most vaccinated  
190 individuals reported receiving only one dose, we assessed effectiveness of a single dose of  
191 kOCV during outbreaks that occurred 12-17 and 24-36 months after vaccination.

## 192 **Study design, setting and vaccination campaigns**

193 We conducted a matched case-control study in Uvira, a city of approximately 280,000  
194 inhabitants on the northwestern shore of Lake Tanganyika with sporadic armed conflict, socio-

195 political instability, and population displacement. Cholera cases are detected year-round in Uvira  
196 since 1978, often with distinct seasonal peaks and notable historical outbreaks.<sup>19,20</sup> Household  
197 surveys conducted in 2016/17 in Uvira indicated surface water as the main drinking water source  
198 for 37.2% of households,<sup>21</sup> and in areas close to the rivers and with the lowest tap water  
199 availability, >80% of households use drinking water contaminated with *Escherichia coli*.<sup>22</sup> The  
200 same surveys estimated that about half (48.2%) of the population relied exclusively on tap water  
201 for drinking needs<sup>21</sup>, and a recent study showed that between 2017 and 2021, the water service  
202 quality remained suboptimal, or deteriorated in many parts of the city.<sup>23 20</sup>

203 In April 2020, severe flooding caused at least 54 deaths, the displacement of approximately  
204 80,000 people, and substantial damage to housing and WASH infrastructure in Uvira, prompting  
205 the Ministry of Health to conduct emergency cholera vaccination campaigns.<sup>24</sup> Vaccination took  
206 place in two rounds, from 29 July to 8 August and 28 September to 05 October 2020 targeting all  
207 individuals in Uvira one year and older. The campaigns included door-to-door vaccination for  
208 five days, followed by vaccination offered through health facilities. While two rounds of  
209 vaccination were implemented, in a representative household survey we conducted 11 months  
210 after vaccination, 23% (95% CI: 20-27%) of the participants reported receiving two doses of the  
211 vaccine and 32% (95% CI: 38-36%) reported receiving one dose. No kOCV has been  
212 administered in this population between these campaigns and the end of our study period, 18  
213 October 2023.

#### 214 **Clinical cholera surveillance system in Uvira**

215 Our study is based on enhanced clinical surveillance of cholera implemented at the two official  
216 health facilities designated to treat cholera patients in Uvira, the cholera treatment centre at the  
217 Uvira General Referral Hospital and the cholera treatment unit at the Kalundu CEPAC health  
218 centre (henceforth, “CTCs”). We attempted to identify and recruit all patients at least 12 months  
219 old with acute watery diarrhoea within the 24 hours prior to the admission to the CTCs (referred  
220 to as ‘suspected cholera’). Trained healthcare staff collected rectal swabs and stools from  
221 participants. Rectal swabs were enriched in alkaline peptone water (APW) for 6-18 hours  
222 depending on patient admission time. Specimens were tested for *V. cholerae* by rapid diagnostic  
223 tests (RDTs) onsite, and by culture using standard methods (Appendix) at either an in-country  
224 reference laboratory, the Laboratoire Rodolphe Mérieux de l’Institut National de Recherche  
225 Biomédicale (INRB), in Goma (from October 2021 to September 2022), or at the onsite study  
226 laboratory (from September 2022 onward). As PCR for *V. cholerae* O1 was not available at  
227 either study laboratory in DRC, we shipped stool specimens (stool spotted on dry filter papers)  
228 for cases enrolled between October 14, 2021 and May 04, 2022 to Johns Hopkins University for  
229 PCR detection of toxigenic *V. cholerae* O1 following published methods.<sup>25</sup>

#### 230 **Selection of cases and controls**

231 Two cholera outbreaks occurred after mass vaccination, and we recruited cases during each  
232 outbreak, forming two distinct study periods (Figure 1). From 21 November 2022 to 24 January  
233 2023, we retrospectively recruited controls for patients admitted to CTCs during the first  
234 outbreak (14 October 2021 to 10 March 2022), approximately 12-17 months after the second  
235 round of mass vaccination campaigns (Study Period 1). Between 17 October 2022 and 18  
236 October 2023, we recruited controls for cases as they were admitted to the CTCs, 24-36 months  
237 after vaccination (Study Period 2).

238 Study Period 1 (SP1) included all consenting suspected cases who were at least 12 months old  
239 during the vaccination campaigns, living in Uvira for the two weeks prior to admission to the  
240 CTC and during the 2020 vaccination campaigns, and who tested positive for cholera by culture  
241 and/or PCR. We attempted to recruit four controls per case, using high-resolution satellite  
242 imagery (Appendix) to identify potential control households on the same avenue (smallest  
243 administrative unit in Uvira) as the case household. Control households were then selected by  
244 simple random spatial sampling of digitized residential structures. Controls were eligible for  
245 enrollment if: (1) they matched the case age group (1-4, 5-9, 10-19, 20-39, 40-59 or  $\geq 60$  years  
246 old) and sex, (2) had not been admitted for acute watery diarrhoea or cholera in the three years  
247 prior to the case admission, (3) were living in Uvira in the two weeks prior to case admission, (4)  
248 were living in Uvira at the time of the 2020 kOCV campaign and were eligible to be vaccinated,  
249 and (5) none of their household members reported being admitted to a formal health facility (as  
250 opposed to pharmacies, prayer homes or traditional healers) for acute watery diarrhoea or cholera  
251 in the four weeks prior to case admission (Table S1).

252 During Study Period 2 (SP2), the case definition included the same age and residence criteria as  
253 in SP1, but cases had to test positive with both APW-enriched rapid diagnostic test (RDT) and  
254 culture (performed at the onsite laboratory). We used enriched RDT results to help prioritize  
255 control recruitment due to limited human resources during the outbreak. In contrast to SP1, we  
256 conducted a home visit within three days of hospital discharge to investigate the living and  
257 WASH conditions in each case's household and ascertain the vaccination status outside the  
258 hospital environment (as done with the controls). We excluded patients who died during  
259 hospitalization and those whose residence could not be found during home visits. As in SP1, four  
260 neighborhood controls were recruited from four randomly selected households near the case  
261 household, though during this study period we selected households using the 'right-hand' rule  
262 (Appendix). In addition to the recruitment criteria used in SP1, controls were eligible for  
263 enrolment in SP2 if their household matched that of the case by size ( $\leq 5$  individuals, 6-10  
264 individuals, and  $>10$  individuals) and had at least one child below five years of age when the  
265 case household had one.

## 266 **Vaccination status ascertainment and potential confounding variables**

267 Study staff administered structured questionnaires to all cases and controls (or their  
268 parent/guardian) to capture demographics, household conditions, potential confounding variables



269 and vaccination status. Before asking each case or control whether they were vaccinated, study  
270 staff showed them photos of the vaccine vials and of someone taking the vaccine, in addition to  
271 explaining when and how the vaccines were delivered in Uvira, and how these may differ from  
272 other campaigns and routine vaccines. Participants reporting vaccination were asked the number  
273 of doses and when and where each one was taken. We also used vaccination cards to verify the  
274 vaccination status whenever possible. In SP1, vaccine-related questions were asked to cases in  
275 the clinic and in SP2 they were asked both in the clinic and a subsequent home visit. Any  
276 differences in the vaccination status reporting between the clinic and household interviews were  
277 solved through a third interview at the case's household followed by a review of the data,  
278 discussion, and consensus within the study team. We identified potential confounders based on a  
279 causal directed acyclic graph developed before the start of the study and attempted to measure  
280 these through the interviews.

## 281 **Statistical analyses**

282 The characteristics of case and control participants were compared using the standardized mean  
283 difference (SMD), which is the absolute difference in mean values of a variable between cases  
284 and controls divided by the pooled standard deviation. In addition, we calculated p-values from  
285 univariate conditional logistic regression models with case-control status as the dependent  
286 variable. In the primary analysis, we compared the odds of being vaccinated with a single kOCV  
287 dose between cases and controls using conditional logistic regression models. Those reporting to  
288 have received 2 or more doses were dropped from the primary analyses. The vaccine  
289 effectiveness (VE) was calculated as one minus the estimated odds ratio of having received a  
290 single dose of vaccine, between cases and controls. To produce consistent age-group specific and  
291 overall estimates of effectiveness across all ages, the conditional logistic regression model  
292 included an interaction term for age group (1-4 vs.  $\geq 5$ ) and the vaccination status. We derived the  
293 overall VE estimate based on a linear combination of parameters from the two age groups,  
294 weighted by the proportion of cases within each, and estimated simultaneous confidence  
295 intervals with the *ghlt* function in the *multcomp* R package.<sup>26</sup> For continuous variables, we  
296 explored models using polynomials and restricted cubic splines, and compared them using  
297 Akaike Information Criterion (AIC). For combined estimates (SP1/2) and those from SP1, we  
298 incorporated age as a continuous variable, separately by the two age groups (with a quadratic  
299 term for the age group  $\geq 5$  years), to adjust for potential confounding. For SP2, estimates were  
300 adjusted for a set of potential confounders including a quadratic term for age, a cubic term for  
301 household size, household wealth index (as a continuous variable) derived from a principal  
302 component analysis of household assets ownership (Appendix), type of sanitation facility,  
303 whether the participant used a toilet shared by multiple households compared to using a private  
304 toilet, drinking water sources, and availability of a hand washing facility and soap. We also fit  
305 three alternative models with different sets of covariates to assess the robustness of the estimates  
306 (Appendix). In a secondary analysis, we estimated the VE for at least one dose and two doses of  
307 kOCV compared to the unvaccinated group. While we primarily relied on point estimates and

308 95% confidence intervals (CI) to assess the weight of evidence, we considered p-values  
309 statistically significant when they were less than 0.05. Analyses were performed in R (version  
310 4.3.1).

### 311 **Ethical considerations**

312 Ethical approvals were obtained from Institutional Review Boards of the Johns Hopkins  
313 Bloomberg School of Public Health (IRB00015785), the London School of Hygiene & Tropical  
314 Medicine (25365) and the École de Santé Publique at the University of Kinshasa  
315 (ESP/CE/65/2021). Written informed consent was obtained from all participants  $\geq 18$  years, with  
316 written assent from those  $< 18$  years in addition to written consent from their parent/guardian.

### 317 **Role of the funding source**

318 The funders of the study had no role in study design, data analysis, interpretation, preparation of  
319 this manuscript, or the decision to publish.

## 320 **Results**

### 321 **Cholera incidence in Uvira and recruitment of study participants**

322  
323 We recruited 658 unique confirmed cholera cases and 2,274 matched controls during the two  
324 study periods (Figure 1), with 61.1% of cases enrolled in the second period. The median age of  
325 participants at the time of the vaccination campaigns was 14.9 (interquartile range 6.3, 33.8)  
326 years and 15.1% were under five years old (Table 1). Almost sixty-two percent of cases were  
327 recorded as severely dehydrated on admission. Cases were significantly older during the first  
328 study period compared to the second period ( $p=0.005$ ), though they all had similar dehydration  
329 status (Table S2). Of the 537 culture positive isolates, 390 (72.6%) were serotype Ogawa, the  
330 rest were Inaba, including 19.3% ( $n=26/135$ ) Inaba in SP1 and 30.1% ( $n = 121/402$ ) Inaba in  
331 SP2.

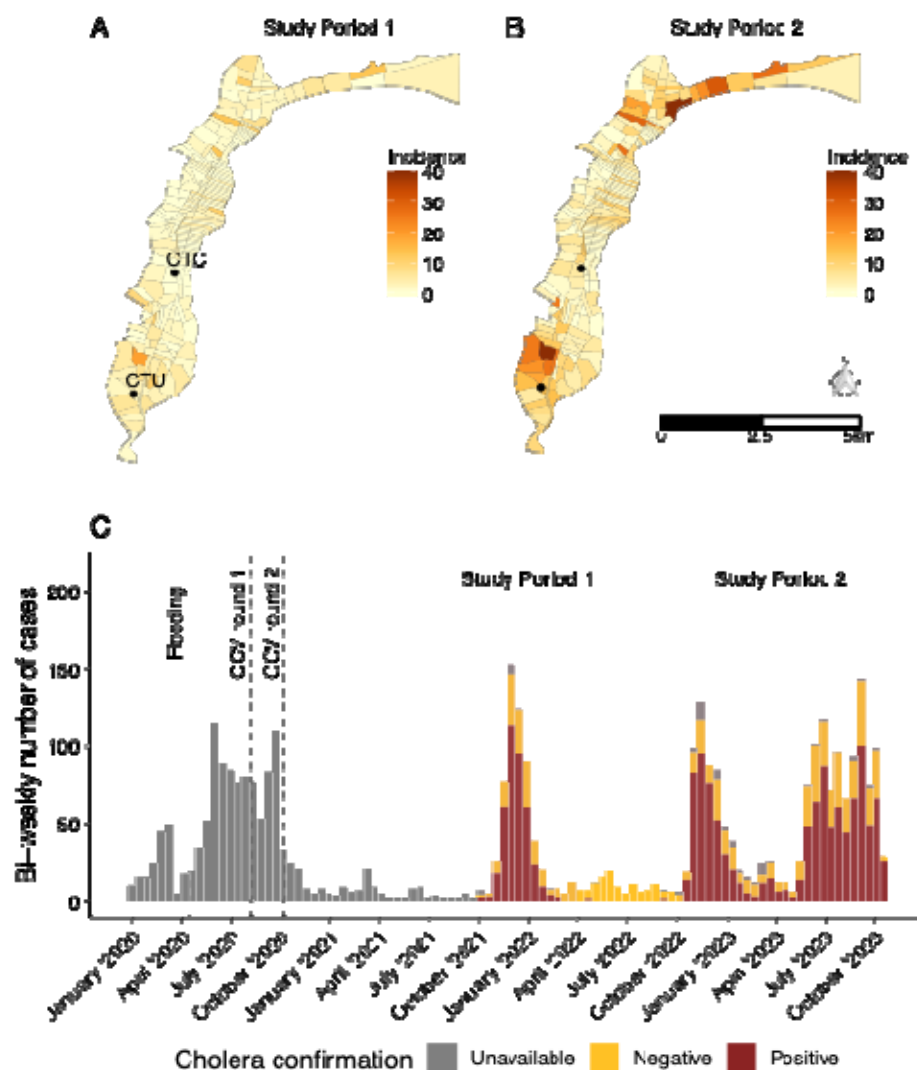

332  
333 **Figure 1. Number of cholera cases admitted to cholera treatment facilities in Uvira.** Panels A  
334 (Study Period 1) and B (Study Period 2) illustrate the cumulative number of confirmed cases in each study  
335 period by neighborhood (avenue) across the city, with the locations of the two health facilities where patients  
336 were recruited shown as dots. There were 14 cases living in neighboring communities outside the city  
337 boundaries that were included in Study Period 2. The second outbreak (Study Period 2) started in the northern  
338 part of the city and spread to a refugee camp where many residents were admitted to the CTC but not included  
339 in the study as they were not living in Uvira at the time of vaccination. Panel C illustrates the epidemic curve  
340 of suspected and confirmed cholera cases admitted to the cholera treatment center (CTC) at the Uvira General  
341 Referral Hospital and the cholera treatment unit (CTU) at the Kalundu CEPAC health center. Cholera was  
342 confirmed by culture or PCR (Study Period 1), or by APW-enriched RDT and culture (Study Period 2).  
343 Among the 183 suspected cases that were detected before SP1 (in grey), 146 (79.8%) were tested for *Vibrio*  
344 *cholerae* O1 by enriched RDT with 37 (25.3%) testing positive.

345  
346 Overall, 20.2% of cases reported receiving one dose of kOCV and 68.7% were unvaccinated. In  
347 comparison, 31.6% of matched controls reported receiving a single dose of kOCV and 56.3%

12

348 were unvaccinated. Only 13.6% of vaccinated participants were able to show a vaccination card  
349 and 11.9% reported having received two doses of the vaccine (Table 1).

350

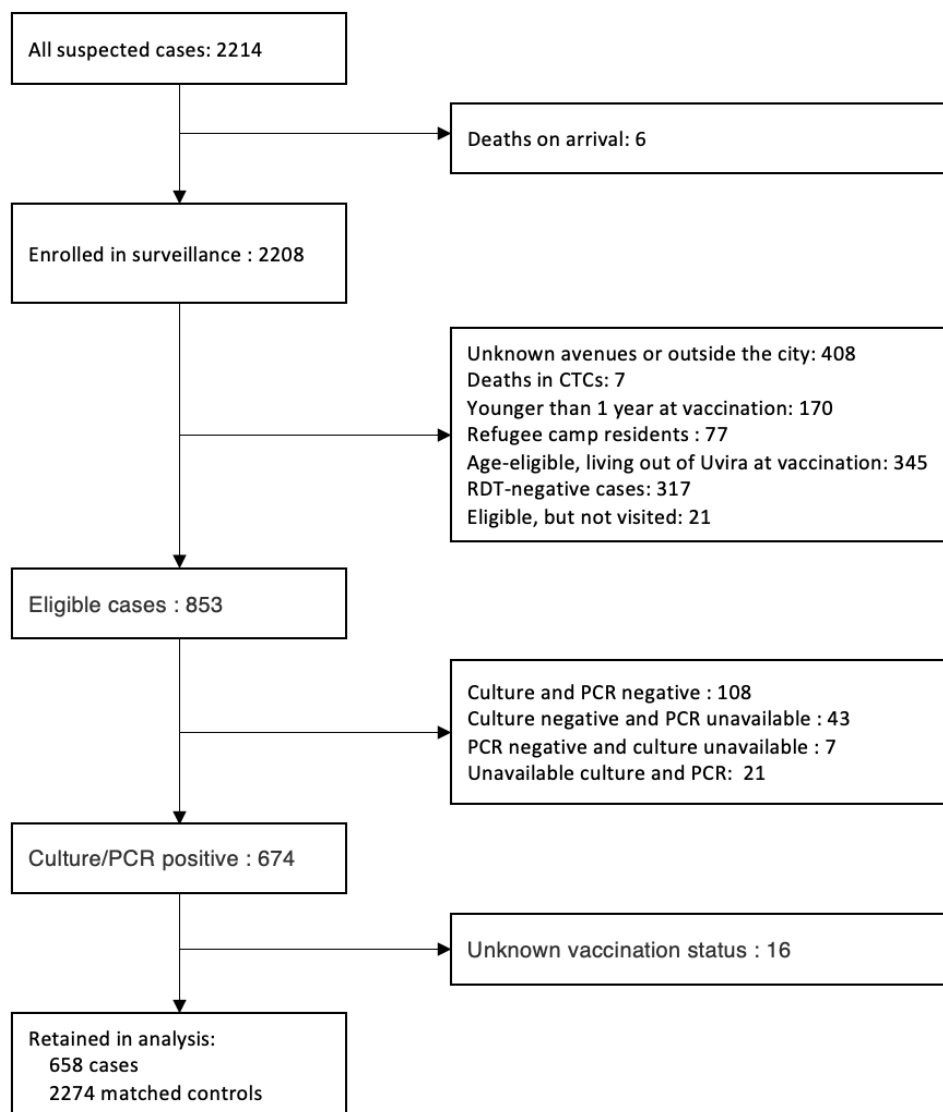

351 **Figure 2.** Flow chart of participant recruitment. Cases with unavailable culture results are those  
352 for which 1) suspected colonies were isolated, 2) with positive oxidase test at the field  
353 laboratory, 3) missing agglutination results due to an antiserum stockout, 4) and/or in which  
354 attempts to revitalize *Vibrio cholerae* O1 strains at the reference laboratory in Goma were  
355 unsuccessful.  
356

357

358

359

360 **Table 1. Characteristics of participants by case and control status.**

| Characteristic                      | Overall,<br>N = 2,932 | Cases,<br>N = 658 | Controls,<br>N = 2,274 | P value   | SMD   |
|-------------------------------------|-----------------------|-------------------|------------------------|-----------|-------|
| Age at vaccination,<br>median (IQR) | 14.9 (6.3,<br>33.8)   | 14.1 (6.0, 33.8)  | 15.1 (6.4,<br>33.7)    | 0.0019    | 0.005 |
| Age group at<br>vaccination (years) |                       |                   |                        |           | 0.122 |
| 1-4                                 | 443 (15.1%)           | 99 (15.0%)        | 344 (15.1%)            | Reference |       |
| 5-9                                 | 552 (18.8%)           | 146 (22.2%)       | 406 (17.9%)            | 0.0080    |       |
| 10-19                               | 764 (26.1%)           | 159 (24.2%)       | 605 (26.6%)            | 0.7183    |       |
| 20-39                               | 606 (20.7%)           | 124 (18.8%)       | 482 (21.2%)            | 0.8436    |       |
| 40-59                               | 401 (13.7%)           | 91 (13.8%)        | 310 (13.6%)            | 0.4146    |       |
| ≥60                                 | 166 (5.7%)            | 39 (5.9%)         | 127 (5.6%)             | 0.4495    |       |
| Sex                                 |                       |                   |                        |           | 0.001 |
| Female                              | 1,503<br>(51.3%)      | 337 (51.2%)       | 1,166 (51.3%)          | Reference |       |
| Male                                | 1,429<br>(48.7%)      | 321 (48.8%)       | 1,108 (48.7%)          | 0.8577    |       |
| Vaccination status                  |                       |                   |                        |           | 0.277 |
| Not Vaccinated                      | 1,732<br>(59.1%)      | 452 (68.7%)       | 1,280 (56.3%)          | Reference |       |
| One Dose                            | 851 (29.0%)           | 133 (20.2%)       | 718 (31.6%)            | <0.0001   |       |
| Two Doses                           | 349 (11.9%)           | 73 (11.1%)        | 276 (12.1%)            | 0.0110    |       |
| Vaccination card<br>available       | 163 (13.6%)           | 29 (14.1%)        | 134 (13.5%)            | 0.1092    | 0.017 |

361 P values are obtained from univariable conditional logistic regression models.

362 Additional data on socio-demographic and household characteristics were collected in SP2  
 363 (Table 2, Table S4). Cases were more likely to use toilets shared by multiple households than  
 364 controls (OR 1.41; 95% CI 1.11-1.79) and were less likely to live in houses with electricity (OR  
 365 0.72; 95% CI 0.56-0.92). Cases were also more likely to live in households with lower wealth  
 366 index, indicating higher level of poverty (OR 0.58; 95% CI 0.44-0.76) than controls. Although  
 367 likely an artifact of hygiene kit distribution that focused on case households, we found that cases  
 368 were more likely to live in households with soap and water available for handwashing (OR 1.86;  
 369 95% CI 1.40-2.49).

370

371

372

373

374

375

376 **Table 2. Characteristics of study participants in the vaccine effectiveness analysis 24-36**  
 377 **months after vaccination (Study Period 2)**

| Characteristic                         | Overall,<br>N = 1,852 | Cases,<br>N = 402 | Controls,<br>N = 1,450 | P value   | SMD   |
|----------------------------------------|-----------------------|-------------------|------------------------|-----------|-------|
| Age group at vaccination (years)*      |                       |                   |                        |           | 0.179 |
| 1-4                                    | 295 (15.9%)           | 60 (14.9%)        | 235 (16.2%)            | Reference |       |
| 5-9                                    | 401 (21.7%)           | 109 (27.1%)       | 292 (20.1%)            | 0.0563    |       |
| 10-19                                  | 466 (25.2%)           | 90 (22.4%)        | 376 (25.9%)            | 0.3003    |       |
| 20-39                                  | 350 (18.9%)           | 67 (16.7%)        | 283 (19.5%)            | 0.0738    |       |
| 40-59                                  | 245 (13.2%)           | 55 (13.7%)        | 190 (13.1%)            | 0.4303    |       |
| ≥60                                    | 95 (5.1%)             | 21 (5.2%)         | 74 (5.1%)              | 0.4427    |       |
| Sex                                    |                       |                   |                        |           | 0.005 |
| Female                                 | 987 (53.3%)           | 215 (53.5%)       | 772 (53.2%)            | Reference |       |
| Male                                   | 865 (46.7%)           | 187 (46.5%)       | 678 (46.8%)            | 0.9500    |       |
| Education attainment**                 |                       |                   |                        |           | 0.353 |
| None or primary                        | 190 (28.4%)           | 52 (41.3%)        | 138 (25.5%)            | Reference |       |
| Lower secondary                        | 119 (17.8%)           | 21 (16.7%)        | 98 (18.1%)             | 0.0277    |       |
| Upper secondary                        | 319 (47.8%)           | 46 (36.5%)        | 273 (50.4%)            | 0.0008    |       |
| Bachelor or higher                     | 40 (6.0%)             | 7 (5.6%)          | 33 (6.1%)              | 0.3492    |       |
| Occupation                             |                       |                   |                        |           | 0.113 |
| No work                                | 289 (15.6%)           | 71 (17.7%)        | 218 (15.0%)            | Reference |       |
| Preschool children                     | 197 (10.6%)           | 45 (11.2%)        | 152 (10.5%)            | 0.5777    |       |
| Students                               | 822 (44.4%)           | 180 (44.8%)       | 642 (44.3%)            | 0.7115    |       |
| Informal work                          | 455 (24.6%)           | 92 (22.9%)        | 363 (25.1%)            | 0.1483    |       |
| Salaried                               | 88 (4.8%)             | 14 (3.5%)         | 74 (5.1%)              | 0.0425    |       |
| Missing                                | 1                     | 0                 | 1                      |           |       |
| Household size, median (IQR)           | 7.0 (6.0, 9.0)        | 7.0 (5.3, 9.0)    | 7.0 (6.0, 9.0)         | 0.2162    | 0.066 |
| Drinking water source                  |                       |                   |                        |           | 0.033 |
| Improved                               | 1,037 (56.0%)         | 220 (54.7%)       | 817 (56.4%)            | Reference |       |
| Unimproved                             | 814 (44.0%)           | 182 (45.3%)       | 632 (43.6%)            | 0.4573    |       |
| Missing                                | 1                     | 0                 | 1                      |           |       |
| Living in household with shared toilet |                       |                   |                        |           | 0.154 |
| Private                                | 843 (45.5%)           | 159 (39.6%)       | 684 (47.2%)            | Reference |       |
| Shared                                 | 1,009 (54.5%)         | 243 (60.4%)       | 766 (52.8%)            | 0.0049    |       |
| Toilet type                            |                       |                   |                        |           | 0.085 |
| Improved                               | 1,265 (68.3%)         | 262 (65.2%)       | 1,003 (69.2%)          | Reference |       |

|                                          |                   |                    |                   | e         |       |
|------------------------------------------|-------------------|--------------------|-------------------|-----------|-------|
| Unimproved                               | 587 (31.7%)       | 140 (34.8%)        | 447 (30.8%)       | 0.1117    |       |
| Soap and water available for handwashing | 881 (47.6%)       | 217 (54.0%)        | 664 (45.8%)       | <0.0001   | 0.164 |
| Living in household with electricity     | 782 (42.2%)       | 150 (37.3%)        | 632 (43.6%)       | 0.0090    | 0.128 |
| Wealth index, median (IQR) ***           | 0.7 (-39.2, 36.3) | -5.3 (-50.0, 31.3) | 2.7 (-30.9, 36.5) | 0.0001    | 0.182 |
| Vaccination status                       |                   |                    |                   |           | 0.244 |
| Not Vaccinated                           | 1,125 (60.7%)     | 275 (68.4%)        | 850 (58.6%)       | Reference |       |
| One Dose                                 | 525 (28.3%)       | 81 (20.1%)         | 444 (30.6%)       | <0.0001   |       |
| Two Doses                                | 202 (10.9%)       | 46 (11.4%)         | 156 (10.8%)       | 0.3868    |       |
| Vaccination card available               | 102 (14.1%)       | 22 (17.9%)         | 80 (13.4%)        | 0.0252    | 0.125 |

378 \*Age group refers to the age on the first day of the second mass vaccination campaign round (01 October  
 379 2020). \*\*The question about education attainment was only asked to individuals aged  $\geq 18$  years. \*\*\*  
 380 Wealth index was multiplied by 100. The higher the wealth index the richer the household. The  
 381 distribution of age and sex of the cases and controls does not match perfectly because the number of  
 382 controls included for each case varied slightly due to enrolled controls either not meeting the eligibility  
 383 criteria (e.g., not living in Uvira during vaccination) or not recalling their vaccination status. P values are  
 384 obtained from univariable conditional logistic regression models.

385  
 386  
 387 Combining data from both study periods, 12-36 months post-vaccination, we estimated an  
 388 unadjusted single-dose VE of 47.8% (95% Confidence Interval [CI] 34.6–58.4) and after  
 389 adjustment for potential confounders, the VE was 48.2% (95% CI 34.8–58.8).

390 In SP1, 12–17 months after vaccination, we estimated an unadjusted and adjusted single-dose  
 391 VE of 54.4% (95% CI: 34.4–68.3) and 52.7% (95% CI: 31.4–67.4). In SP2, 24–36 months after  
 392 vaccination, we estimated an unadjusted VE of 43.2% (95% CI: 24.0–57.6) and an adjusted VE  
 393 of 45.5% (95% CI: 25.8–60.0). The adjusted VE for 1–4-year-olds was 73.5% (95% CI: 28.9–  
 394 90.1) in SP1 sharply declining to 33.1% (95% CI: -30.0–65.6) in SP2 and the confidence  
 395 intervals span the null (Table 3).

396  
 397 **Table 3. Effectiveness of a single dose of oral cholera vaccine, 12-17 months and 24-36**  
 398 **months after vaccination campaigns.**

| Population                                             | Cases (effective n*) | Controls (effective n*) | Unadjusted VE (95% CI) | Adjusted VE** (95% CI) |
|--------------------------------------------------------|----------------------|-------------------------|------------------------|------------------------|
| <b>12-36 months after vaccination</b>                  |                      |                         |                        |                        |
| Overall                                                | 573 (419)            | 1998 (763)              | 47.8% (34.6–58.4)      | 48.2% (34.8–58.8)      |
| 1-4 years                                              | 96 (61)              | 263 (129)               | 52.4% (22.5–70.8)      | 49.8% (15.6–70.2)      |
| $\geq 5$ years                                         | 463 (332)            | 1534 (584)              | 46.7% (31.8–58.4)      | 47.8% (32.8–59.5)      |
| <b>12-17 months after vaccination (Study Period 1)</b> |                      |                         |                        |                        |

|                                                        |           |            |                   |                    |
|--------------------------------------------------------|-----------|------------|-------------------|--------------------|
| Overall                                                | 219 (170) | 704 (300)  | 54.4% (34.4–68.3) | 52.7% (31.4–67.4)  |
| 1-4 years                                              | 34 (23)   | 83 (44)    | 68.3% (19.6–87.5) | 73.5% (28.9–90.1)  |
| ≥5 years                                               | 179 (141) | 568 (243)  | 50.9% (28.0–66.6) | 46.9% (21.0–64.3)  |
| <b>24-36 months after vaccination (Study Period 2)</b> |           |            |                   |                    |
| Overall                                                | 354 (249) | 1294 (463) | 43.2% (24.0–57.6) | 45.5% (25.8–60.0)  |
| 1-4 years                                              | 62 (38)   | 180 (85)   | 42.8% (-2.2–68.0) | 33.1% (-30.0–65.6) |
| ≥5 years                                               | 284 (191) | 966 (341)  | 43.4% (21.7–59.0) | 48.3% (27.2–63.3)  |

399 \*Effective number of cases and controls is the sample size that effectively contributes to estimates of effectiveness in  
400 the conditional logistic regression models. Those participants in matched case-control sets where all people have the  
401 same vaccination status do not contribute to the estimates, nor do those who either do not know their vaccination  
402 status or the number of doses they received. \*\*In SPI and in analyses combining data from both study periods, we  
403 only adjusted for age as a continuous variable

404 In secondary analyses, we estimated the adjusted cumulative VE across both study periods for at  
405 least one dose of kOCV to be 45.4% (95% CI: 33.2–55.3, Table S8). We were unable to  
406 reliably estimate two-dose VE due to a limited effective sample size, with post-hoc power  
407 calculations suggesting we had 50.9% power to detect significant vaccine protection even when  
408 combining data from both study periods and 5.1% power in young children (Table S9, Table  
409 S10).

## 410 Discussion

411 We found that a single dose of Euvichol-Plus<sup>®</sup> kOCV provided protection against cholera for at  
412 least the 36-month period post-vaccination. Our study provides unique, policy-relevant insights  
413 into kOCV protection as we estimated single-dose effectiveness from the only available and  
414 most widely used cholera vaccine today, including estimates of effectiveness for 1–4-year-olds  
415 and at discrete time windows after vaccination. Our results suggest that at least in cholera  
416 endemic areas like Uvira, the use of one kOCV dose may provide significant protection on the  
417 scale of years rather than just months.

418  
419 To date, one randomized trial<sup>17,18</sup> and seven observational studies have included estimates of  
420 one-dose protection of kOCVs.<sup>7–9,13–15,27</sup> Most of these studies have been short-term estimates of  
421 protection measured for just a few months after vaccination and showed similar levels of  
422 protection to two doses on this timescale. Two notable exceptions where protection was  
423 measured over a longer period include a randomized trial in Bangladesh and a case-control study  
424 in Haiti, both using Shanchol<sup>®</sup>. The Bangladesh trial was conducted for two years and estimated  
425 54% (95% CI: 16 to 75) efficacy in the first year and 67% (43 to 81) in the second year post-  
426 vaccination among those five years and older.<sup>17</sup> Secondary analyses from a case-control study in  
427 Haiti predicted that a single dose of kOCV (Shanchol<sup>®</sup>) would confer 58% (95% CI: 4 to 82%)  
428 protection at 16 months post-vaccination, with the confidence intervals including zero protection  
429 from 17-months post-vaccination and onward.<sup>14</sup> Our results are consistent with these previous  
430 studies in showing significant protection for the overall population for longer than a year, though  
431 it is important to note that Uvira, like Haiti (at the time of the study) and Bangladesh, is endemic  
432 for cholera so the first dose may have acted as a booster for previously exposed individuals.



433 Furthermore, it is possible that previous exposures to enterotoxigenic *Escherichia coli*, which has  
434 been identified among diarrhoea cases in Uvira and has a antigenically similar toxin to toxigenic  
435 *V. cholerae*, could contribute to background immunity to severe disease in these settings.<sup>28</sup> More  
436 work is needed to characterize the epidemiologic settings where one dose may provide  
437 comparable levels of protection to the full regimen, and might include leveraging historic  
438 incidence rates of cholera or, perhaps, population-level immunologic measures of previous  
439 exposures.<sup>29</sup>

440 Before this study, only one estimate of single-dose protection of a kOCV in 1–4-year-olds had  
441 been published. This trial, in Bangladesh, suggested that young children did not benefit from a  
442 single dose of Shanchol<sup>®</sup>, even during the first six months post-vaccination.<sup>17,18</sup> In contrast, we  
443 found evidence that the population under five years old in Uvira benefited from similar levels of  
444 protection to those five and above at 12-17 months post-vaccination, however the point estimates  
445 dropped substantially in the third year after vaccination with confidence intervals spanning the  
446 null. This observation is in line with studies showing similar levels of protection after natural  
447 infection between the two age groups.<sup>30</sup> Conflicting estimates between young children and older  
448 individuals have also been observed in kOCV studies with the full dose regimen, though there  
449 are only a handful of studies that present age-stratified estimates. Although most studies have  
450 found lower effectiveness in young children, the difference in protection has been highly variable  
451 with large uncertainty (e.g., ranging from no apparent difference in Vietnam after 10 months,<sup>31</sup> to  
452 73% lower protective efficacy among children in Bangladesh over 6 months post-vaccination<sup>18</sup>).  
453 The contrast of our estimates with other studies could be explained by several factors including  
454 pre-existing population immunity and season of vaccination as shown with other diseases,<sup>32</sup>  
455 differences both in gut microbiota composition and in prevalence of enteropathy, however, as in  
456 all observational studies we cannot rule out confounding and selection bias.<sup>33,34</sup> Additional  
457 observational, and ideally randomized trials, would help shed further light on protection of one  
458 dose of kOCV among young children.

459 While the focus of the study was to understand the direct effectiveness of kOCV, our analysis of  
460 potential risk factors highlighted key differences between cases and matched controls. Our  
461 results confirm the associations between cholera and markers of poverty, like using a shared  
462 latrine, using an unimproved source for drinking water and not having electricity in the  
463 household. While kOCV provides protection against cholera, tackling fundamental risk factors  
464 like access to safe water and sanitation are needed to sustainably control the disease.

465 This study comes with several limitations. First, like many previous kOCV effectiveness studies,  
466 the vaccination status was self-reported,<sup>7,14,15</sup> and only 29 cases (of 206 reporting to be  
467 vaccinated) were able to provide a vaccination card. Measurements of the number of doses  
468 received months to years after a mass vaccination campaign is prone to recall bias, particularly in  
469 a place like Uvira where mass vaccination campaigns with different antigens are common. To  
470 minimize biases in classification of vaccination status, we used visual aids and a series of  
471 structured questions, and hospital and study staff reassured patients that their responses to the

472 study questions would in no way affect their care. Though enumerators were not blinded to the  
473 vaccination status of the cases while enrolling their matched controls, the vaccine coverage  
474 among controls was similar to that measured in community coverage surveys (Table S12).  
475 Furthermore, sensitivity analyses restricted to only those with a vaccination card revealed similar  
476 effectiveness estimates (Table S5). There were slight differences in the protocols of the case-  
477 control study in each study period, challenging the interpretability of the joint estimates from  
478 both periods. However, in sensitivity analyses simulating similar diagnostic criteria for cases in  
479 SP1 and SP2, our qualitative findings remained consistent (Table S11). The retrospective  
480 recruitment of controls for cases admitted during the SP1 precluded adjustment for individual  
481 and household factors that may have influenced cholera disease risk or vaccine acceptability.  
482 However, such factors are unlikely to have significantly influenced the magnitude of our VE  
483 estimates as we observed in the SP 2 (Table S6 and S7) and other cholera VE studies conducted  
484 elsewhere.<sup>7,14,15</sup> The retrospective nature of recruitment of controls in SP1 could also have led to  
485 differential recall of vaccination status among cases and their controls. Even in SP2, our VE  
486 estimates could still be confounded by unmeasured factors. Although the number of cases under  
487 five years of age was higher than in most published VE studies, our sample size in this important  
488 age group was still small and led to wide confidence intervals around VE estimates (Table S2  
489 and S10). Finally, we were unable to obtain reliable estimates of two dose protection partly  
490 because few cases reported receipt of two doses of kOCV due to low vaccination coverage in the  
491 population, and potentially because of uncertainty in the reporting of more than one dose of  
492 kOCV (Tables S2, S3 S9 and Figure S2).

493  
494 Our findings, combined with data from dose-interval studies conducted in Cameroon and  
495 Zambia<sup>35,36</sup>, suggest that providing a second dose a year or more after the first could lead to  
496 better and longer lasting protection against cholera than the current two-dose series, at least  
497 among older children and adults. While more data are needed across different settings and for  
498 longer periods of time, our study extends the current evidence base on protection from a single-  
499 dose of kOCV, and more specifically on protection from Euvichol-Plus<sup>®</sup>, the most widely used  
500 cholera vaccine available today.

501  
502  
503  
504  
505  
506  
507  
508  
509

## 510 **Declarations**

511 *Funding*

512 This work was supported by the Wellcome Trust and Gavi (GAVI-RFP-2019-062).

513 *Authors' contributions*

514 Conceptualization: EBM, ASA, JK. Data curation: EBM, JDH, HX, CH, PMB, ASA. Formal  
515 analysis: EBM, ASA. Data interpretation: EBM, ASA, JK, JL, EL. Funding acquisition: ASA,  
516 KG, OC. Investigation: EBM, PMB, CH, HX, JDH, BBR, MI, ETT, FK, TBM, AD, EL, DL, JK,  
517 ASA. Methodology: EBM, ASA, CH, JK. Project Administration: EBM, PMB, MD, DMB,  
518 HKM, CH, ASA, KG. Resources: PWO, JMS, DMB, AD, JK, OL. Software: EBM, JDH, HX,  
519 ASA. Supervision: ASA, JK. Validation: EBM, ASA. Visualization - EBM, ASA. Writing -  
520 original draft - EBM, ASA. Writing: review & editing: all authors.

521 *Acknowledgements*

522 We are thankful to Faraja Masema Lulela, Joël Faraja Zigashane Mashauri, Jean-Marie  
523 Masugamuhanya Cirhonda, the CTCs nurses and field investigators for their support for the data  
524 collection. We also thank the Head of the Uvira Health Zone, Dr Panzu Nimi, and the Director of  
525 the Uvira General Referral Hospital, Dr Salomon Mashupe, for their operational and  
526 administrative support throughout this study. We would also like to thank the MSF GIS Centre,  
527 including Frederic Ham and Edith Rogenhofer, for their assistance with acquiring satellite  
528 imagery data and Ahmad Alobaidi for assistance with dwelling extractions from this imagery.

529 *Data sharing*

530 Code and data from this study are available at  
531 [https://github.com/HopkinsIDD/uvira\\_onedose\\_ocv\\_ve](https://github.com/HopkinsIDD/uvira_onedose_ocv_ve).

532

533 **References**

- 534 1 Deshpande A, Miller-Petrie MK, Lindstedt PA, *et al*. Mapping geographical inequalities in access to  
535 drinking water and sanitation facilities in low-income and middle-income countries, 2000–17. *The*  
536 *Lancet Global Health* 2020; **8**: e1162–85.
- 537 2 World Health Organization. Global Task Force on Cholera Control. Ending Cholera, a Global  
538 Roadmap to 2030. World Health Organization, 2017.
- 539 3 Bi Q, Ferreras E, Pezzoli L, *et al*. Protection against cholera from killed whole-cell oral cholera  
540 vaccines: a systematic review and meta-analysis. *Lancet Infect Dis* 2017; **17**: 1080–8.
- 541 4 Ali M, Qadri F, Kim DR, *et al*. Effectiveness of a killed whole-cell oral cholera vaccine in  
542 Bangladesh: further follow-up of a cluster-randomised trial. *Lancet Infect Dis* 2021; **21**: 1407–14.
- 543 5 Burki T. Addressing the shortage of cholera vaccines. *Lancet Infect Dis* 2022; **22**: 1674–5.
- 544 6 Odevall L, Hong D, Digilio L, *et al*. The Euvichol story - Development and licensure of a safe,  
545 effective and affordable oral cholera vaccine through global public private partnerships. *Vaccine*

- 546 2018; **36**: 6606–14.
- 547 7 Luquero FJ, Grout L, Ciglenecki I, *et al.* Use of *Vibrio cholerae* vaccine in an outbreak in Guinea. *N*  
548 *Engl J Med* 2014; **370**: 2111–20.
- 549 8 Azman AS, Parker LA, Rumunu J, *et al.* Effectiveness of one dose of oral cholera vaccine in  
550 response to an outbreak: a case-cohort study. *Lancet Glob Health* 2016; **4**: e856–63.
- 551 9 Grandesso F, Kasambara W, Page A-L, *et al.* Effectiveness of oral cholera vaccine in preventing  
552 cholera among fishermen in Lake Chilwa, Malawi: A case-control study. *Vaccine* 2019; **37**: 3668–  
553 76.
- 554 10 Sialubanje C, Kapina M, Chewe O, *et al.* Effectiveness of two doses of Euvichol-plus oral cholera  
555 vaccine in response to the 2017/2018 outbreak: a matched case-control study in Lusaka, Zambia.  
556 *BMJ Open* 2022; **12**: e066945.
- 557 11 World Health Organization. Weekly epidemiological record. World Health Organization, 22  
558 SEPTEMBER 2023, 98th YEAR <https://iris.who.int/handle/10665/372986> (accessed Oct 17, 2023).
- 559 12 World Health Organization. Shortage of cholera vaccines leads to temporary suspension of two-dose  
560 strategy, as cases rise worldwide. 2022; published online Oct 19. [https://www.who.int/news/item/19-  
561 10-2022-shortage-of-cholera-vaccines-leads-to-temporary-suspension-of-two-dose-strategy--as-  
562 cases-rise-worldwide](https://www.who.int/news/item/19-10-2022-shortage-of-cholera-vaccines-leads-to-temporary-suspension-of-two-dose-strategy--as-cases-rise-worldwide) (accessed March 24, 2023).
- 563 13 Khatib AM, Ali M, von Seidlein L, *et al.* Effectiveness of an oral cholera vaccine in Zanzibar:  
564 findings from a mass vaccination campaign and observational cohort study. *Lancet Infect Dis* 2012;  
565 **12**: 837–44.
- 566 14 Franke MF, Ternier R, Jerome JG, Matias WR, Harris JB, Ivers LC. Long-term effectiveness of one  
567 and two doses of a killed, bivalent, whole-cell oral cholera vaccine in Haiti: an extended case-control  
568 study. *Lancet Glob Health* 2018; **6**: e1028–35.
- 569 15 Ferreras E, Blake A, Chewe O, *et al.* Alternative observational designs to estimate the effectiveness  
570 of one dose of oral cholera vaccine in Lusaka, Zambia. *Epidemiol Infect* 2020; **148**: e78.
- 571 16 Ivers LC, Hilaire IJ, Teng JE, *et al.* Effectiveness of reactive oral cholera vaccination in rural Haiti: a  
572 case-control study and bias-indicator analysis. *Lancet Glob Health* 2015; **3**: e162–8.
- 573 17 Qadri F, Ali M, Lynch J, *et al.* Efficacy of a single-dose regimen of inactivated whole-cell oral  
574 cholera vaccine: results from 2 years of follow-up of a randomised trial. *Lancet Infect Dis* 2018; **18**:  
575 666–74.
- 576 18 Qadri F, Wierzba TF, Ali M, *et al.* Efficacy of a Single-Dose, Inactivated Oral Cholera Vaccine in  
577 Bangladesh. *N Engl J Med* 2016; **374**: 1723–32.
- 578 19 Bugeme PM, Xu H, Hutchins C, *et al.* Cholera deaths during outbreaks in Uvira, Eastern Democratic  
579 Republic of Congo, September 2021-January 2023. bioRxiv. 2023; published online June 3.  
580 DOI:10.1101/2023.05.26.23290528.
- 581 20 Schyns C, Fossa A, Mutombo-Nfenda, *et al.* Cholera in Eastern Zaire, 1978. *Ann Soc Belg Med Trop*  
582 1979; **59**: 391–400.
- 583 21 Jeandron A. Tap water access and its relationship with cholera and other diarrhoeal diseases in an

- 584 urban, cholera-endemic setting in the Democratic Republic of the Congo. 2020; published online  
585 Dec 12. DOI:10.17037/PUBS.04659288.
- 586 22 Jeandron A, Cumming O, Kapepula L, Cousens S. Predicting quality and quantity of water used by  
587 urban households based on tap water service. *npj Clean Water* 2019; **2**: 1–9.
- 588 23 Gaiffe M, Dross C, Malembaka EB, Ross I, Cumming O, Gallandat K. A fuzzy inference-based  
589 index for piped water supply service quality in a complex, low-income urban setting. *Water Res*  
590 2023; : 120316.
- 591 24 Gallandat K, Macdougall A, Jeandron A, *et al.* 1 Improved water supply infrastructure to reduce  
592 acute diarrhoeal diseases and 2 cholera in Uvira, Democratic Republic of the Congo: results and  
593 lessons learned 3 from a pragmatic trial. <https://osf.io/na47d/download> (accessed July 23, 2023).
- 594 25 Debes AK, Ateudjieu J, Guenou E, *et al.* Clinical and Environmental Surveillance for *Vibrio*  
595 *cholerae* in Resource Constrained Areas: Application During a 1-Year Surveillance in the Far North  
596 Region of Cameroon. *Am J Trop Med Hyg* 2016; **94**: 537–43.
- 597 26 Hothorn T, Bretz F, Westfall P. Simultaneous inference in general parametric models. *Biom J* 2008;  
598 **50**: 346–63.
- 599 27 Wierzba TF, Kar SK, Mogasale VV, *et al.* Effectiveness of an oral cholera vaccine campaign to  
600 prevent clinically-significant cholera in Odisha State, India. *Vaccine* 2015; **33**: 2463–9.
- 601 28 Clemens JD, Sack DA, Harris JR, *et al.* Cross-Protection by B Subunit-Whole Cell Cholera Vaccine  
602 Against Diarrhea Associated with Heat-Labile Toxin-Producing Enterotoxigenic *Escherichia coli*:  
603 Results of a Large-Scale Field Trial. *J Infect Dis* 1988; **158**: 372–7.
- 604 29 Azman AS, Lessler J, Luquero FJ, *et al.* Estimating cholera incidence with cross-sectional serology.  
605 *Sci Transl Med* 2019; **11**. DOI:10.1126/scitranslmed.aau6242.
- 606 30 Ali M, Emch M, Park JK, Yunus M, Clemens J. Natural Cholera Infection–Derived Immunity in an  
607 Endemic Setting. *J Infect Dis* 2011; **204**: 912–8.
- 608 31 Trach DD, Clemens JD, Ke NT, *et al.* Field trial of a locally produced, killed, oral cholera vaccine in  
609 Vietnam. *Lancet* 1997; **349**: 231–5.
- 610 32 Moore SE, Collinson AC, Fulford AJC, *et al.* Effect of month of vaccine administration on antibody  
611 responses in The Gambia and Pakistan. *Trop Med Int Health* 2006; **11**: 1529–41.
- 612 33 Zimmermann P, Curtis N. Factors That Influence the Immune Response to Vaccination. *Clin*  
613 *Microbiol Rev* 2019; **32**. DOI:10.1128/CMR.00084-18.
- 614 34 Porras AM, Shi Q, Zhou H, *et al.* Geographic differences in gut microbiota composition impact  
615 susceptibility to enteric infection. *Cell Rep* 2021; **36**: 109457.
- 616 35 Mwaba J, Chisenga CC, Xiao S, *et al.* Serum vibriocidal responses when second doses of oral  
617 cholera vaccine are delayed 6 months in Zambia. *Vaccine* 2021; **39**: 4516–23.
- 618 36 Ateudjieu J, Sack DA, Nafack SS, *et al.* An Age-stratified, Randomized Immunogenicity Trial of  
619 Killed Oral Cholera Vaccine with Delayed Second Dose in Cameroon. *Am J Trop Med Hyg* 2022;  
620 **107**: 974–83.
